# Supplementary material
Source: publisher figshare collection journal article supplement (https://acs.figshare.com/ndownloader/files/4540405)
Supplement: Supplementary file 1 [file 4540405]

## Supporting Information

| Method                                                          | GC                             | Method No.           |                                                              | Purpose                | Monitor the in-process reaction, methanol and dihydropyran content, potency |
|-----------------------------------------------------------------|--------------------------------|----------------------|--------------------------------------------------------------|------------------------|-----------------------------------------------------------------------------|
| Conditions 60°C, 10 C/min to 250 C; hold at 250 C for 5 minutes |                                |                      |                                                              |                        |                                                                             |
| Detector Type                                                   | FID                            |                      |                                                              | Column Type            | HP-5                                                                        |
| Head Pressure                                                   | 8 p.s.i                        |                      |                                                              | Column Dimensions      | 30m x 0.32 mmID                                                             |
| Injection volume                                                | 2 µL                           |                      |                                                              | Column I.D.            | 1 µm film thickness                                                         |
| Split Ratio                                                     | 50/1                           |                      |                                                              | Injector Temp.         | 250°C                                                                       |
| Split Flow                                                      | 50                             |                      |                                                              | Detector Temp.         | 280°C                                                                       |
| Total Flow                                                      | 83                             |                      |                                                              |                        |                                                                             |
| Relative Retention Time                                         |                                |                      |                                                              |                        |                                                                             |
|                                                                 | Material                       |                      | RT (min)                                                     | Comments               |                                                                             |
|                                                                 | Methanol                       |                      | 1.1                                                          | Dilute in DMF          |                                                                             |
|                                                                 | Acetonitrile                   |                      | 1.3                                                          | Dilute in DMF          |                                                                             |
|                                                                 | THF                            |                      | 1.8                                                          | Dilute in DMF          |                                                                             |
|                                                                 | Methylene Chloride             |                      | 1.3                                                          | Dilute in DMF          |                                                                             |
|                                                                 | Dihydropyran                   |                      | 2.1                                                          | Dilute in Acetonitrile |                                                                             |
|                                                                 | Morpholine                     |                      | 3.1                                                          | Dilute in Acetonitrile |                                                                             |
|                                                                 | 4                              |                      | 18.3                                                         | Dilute in Acetonitrile |                                                                             |
|                                                                 | 3                              |                      | 12.1                                                         | Dilute in Acetonitrile |                                                                             |
|                                                                 | 2 methyl lactate               |                      | 2.5                                                          | Dilute in Acetonitrile |                                                                             |
| Sample Preparation                                              |                                |                      |                                                              |                        |                                                                             |
|                                                                 | Process Stream                 | Compound of Interest | Procedure                                                    |                        |                                                                             |
| 1                                                               | Reaction                       | 4,3                  | 10 (µL) of reaction mixture diluted into 1.0 mL acetonitrile |                        |                                                                             |
| 2                                                               | Residual Solvent Concentration | Methanol<br>THF      | 10 (µL) of reaction mixture diluted into 1.0 mL              |                        |                                                                             |

|                                                                 |                         |                      |                                        |                   |                                     |
|-----------------------------------------------------------------|-------------------------|----------------------|----------------------------------------|-------------------|-------------------------------------|
| Method                                                          | GC                      | Method No.           |                                        | Purpose           | Chiral resolution of methyl lactate |
| Conditions 60°C, 50 C/min to 150 C; hold at 150 C for 5 minutes |                         |                      |                                        |                   |                                     |
| Detector Type                                                   | FID                     |                      |                                        | Column Type       | Restek Rt-βDEXse                    |
| Head Pressure                                                   | 8 p.s.i                 |                      |                                        | Column Dimensions | 30m x 0.32 mmID                     |
| Injection volume                                                | 1 μL                    |                      |                                        | Column I.D.       | 0.25 μm film thickness              |
| Split Ratio                                                     | 20/1                    |                      |                                        | Injector Temp.    | 200°C                               |
| Split Flow                                                      | 50                      |                      |                                        | Detector Temp.    | 200°C                               |
| Total Flow                                                      | 60                      |                      |                                        |                   |                                     |
| Relative Retention Time                                         |                         |                      |                                        |                   |                                     |
|                                                                 | Material                |                      | RT (min)                               | Comments          |                                     |
| 6                                                               | (R)-methyl lactate      |                      | 6.16                                   |                   |                                     |
| 6                                                               | (S)-methyl lactate    2 |                      | 7.70                                   |                   |                                     |
| Sample Preparation                                              |                         |                      |                                        |                   |                                     |
|                                                                 | Process Stream          | Compound of Interest | Procedure                              |                   |                                     |
| 1                                                               | Pre-synthesis           | 2                    | Dilute in 50% ethyl alcohol/50% hexane |                   |                                     |

| Method                | HPLC                             | Method No. |                      | Purpose               | Optical Purity of 3                          |            |
|-----------------------|----------------------------------|------------|----------------------|-----------------------|----------------------------------------------|------------|
| Conditions            |                                  |            |                      |                       |                                              |            |
| Instrument            | Agilent                          |            |                      | Column Type           | Chiralcel OD                                 |            |
| Detector Type         | UV                               |            |                      | Size & Packing        | 4.6x<br>250mm                                | 10.0<br>µm |
| Monitoring Wavelength | 210 nm                           |            |                      | Temperature           | RT                                           |            |
| Recording time        | 35 min                           |            |                      | Flow Rate             | 1.0 mL/min                                   |            |
| Equilibration Time    | 5 min                            |            |                      | Sampler Flush Solvent | Mobile Phase                                 |            |
| Mobile Phase          | 50% Isopropyl alcohol/50% Hexane |            |                      |                       |                                              |            |
| Retention Times       |                                  |            |                      |                       |                                              |            |
|                       | Material                         |            |                      | RRT                   | RT (min)                                     | Comments   |
|                       | 3 (R)                            |            |                      |                       | 26.3                                         |            |
|                       | (S)                              |            |                      |                       | 30.2                                         |            |
| Sample Preparation    |                                  |            |                      |                       |                                              |            |
|                       | Process Stream                   |            | Compound of Interest | Inj. Vol              | Procedure                                    |            |
| 1                     | Reaction mixture                 |            | 3                    | 5.0 µL                | Dilute to within the linear range (~2 mg/mL) |            |

| Method                | HPLC                             | Method No.            |          | Purpose                                      | Optical Purity of <b>4</b> and <b>3</b> |        |
|-----------------------|----------------------------------|-----------------------|----------|----------------------------------------------|-----------------------------------------|--------|
| Conditions            |                                  |                       |          |                                              |                                         |        |
| Instrument            | Agilent                          |                       |          | Column Type                                  | Chiralcel AS-H, Diacel Inc.             |        |
| Detector Type         | UV                               |                       |          | Size & Packing                               | 4.6x 250mm                              | 5.0 μm |
| Monitoring Wavelength | 210 nm                           |                       |          | Temperature                                  | RT                                      |        |
| Recording time        | 20 min                           |                       |          | Flow Rate                                    | 1.0 mL/min                              |        |
| Equilibration Time    | 5 min                            |                       |          | Sampler Flush Solvent                        | Mobile Phase                            |        |
| Mobile Phase          | 20% Isopropyl alcohol/80% Hexane |                       |          |                                              |                                         |        |
| Retention Times       |                                  |                       |          |                                              |                                         |        |
|                       | Material                         |                       | RRT      | RT (min)                                     | Comments                                |        |
|                       | <b>3</b> (R)                     |                       |          | 13.0                                         |                                         |        |
|                       | <b>3</b> (S)                     |                       |          | 10.7                                         |                                         |        |
|                       | <b>4</b> (R)                     |                       |          | 6.8                                          |                                         |        |
|                       | <b>4</b> (S)                     |                       |          | 9.8                                          |                                         |        |
|                       | <b>17</b> (R)                    |                       |          | 7.7                                          |                                         |        |
|                       | <b>17</b> (S)                    |                       |          | 6.4                                          |                                         |        |
| Sample Preparation    |                                  |                       |          |                                              |                                         |        |
|                       | Process Stream                   | Compound of Interest  | Inj. Vol | Procedure                                    |                                         |        |
| <b>1</b>              | Reaction mixture                 | <b>3</b> and <b>4</b> | 5.0 μL   | Dissolve in 50% isopropyl alcohol/50% hexane |                                         |        |

|                                                                 |                             |                                                                        |                                                                                                                                                                                                                                                                                                            |                   |                                                                       |
|-----------------------------------------------------------------|-----------------------------|------------------------------------------------------------------------|------------------------------------------------------------------------------------------------------------------------------------------------------------------------------------------------------------------------------------------------------------------------------------------------------------|-------------------|-----------------------------------------------------------------------|
| Method                                                          | GC                          | Method No.                                                             |                                                                                                                                                                                                                                                                                                            | Purpose           | Monitor the in-process reaction for converting <b>4</b> to <b>7</b> . |
| Conditions 60°C, 10 C/min to 250 C; hold at 250 C for 5 minutes |                             |                                                                        |                                                                                                                                                                                                                                                                                                            |                   |                                                                       |
| Detector Type                                                   |                             | FID                                                                    |                                                                                                                                                                                                                                                                                                            | Column Type       | 5% diphenyl/95% dimethyl polysiloxane (Restek Rtx-5 capillary)        |
| Head Pressure                                                   |                             | 8 p.s.i                                                                |                                                                                                                                                                                                                                                                                                            | Column Dimensions | 30m x 0.32 mmID                                                       |
| Injection volume                                                |                             | 2 µL                                                                   |                                                                                                                                                                                                                                                                                                            | Column I.D.       | 1 µm film thickness                                                   |
| Split Ratio                                                     |                             | 50/1                                                                   |                                                                                                                                                                                                                                                                                                            | Injector Temp.    | 250°C                                                                 |
| Split Flow                                                      |                             | 50                                                                     |                                                                                                                                                                                                                                                                                                            | Detector Temp.    | 280°C                                                                 |
| Total Flow                                                      |                             | 83                                                                     |                                                                                                                                                                                                                                                                                                            |                   |                                                                       |
| Relative Retention Time                                         |                             |                                                                        |                                                                                                                                                                                                                                                                                                            |                   |                                                                       |
|                                                                 | Material                    |                                                                        | RT (min)                                                                                                                                                                                                                                                                                                   | Comments          |                                                                       |
|                                                                 | Difluorobenzene             |                                                                        | 1.9                                                                                                                                                                                                                                                                                                        | Dilute in CH2Cl2  |                                                                       |
|                                                                 | 1-Bromo-2,4-difluorobenzene |                                                                        | 4.8                                                                                                                                                                                                                                                                                                        | Dilute in CH2Cl2  |                                                                       |
|                                                                 | <b>7</b>                    |                                                                        | 16.2                                                                                                                                                                                                                                                                                                       | Dilute in CH2Cl2  |                                                                       |
|                                                                 | <b>4</b>                    |                                                                        | 18.2                                                                                                                                                                                                                                                                                                       | Dilute in CH2Cl2  |                                                                       |
|                                                                 | Methylene chloride          |                                                                        | 1.2                                                                                                                                                                                                                                                                                                        |                   |                                                                       |
|                                                                 | Ethyl Acetate               |                                                                        | 1.6                                                                                                                                                                                                                                                                                                        |                   |                                                                       |
|                                                                 | n-Heptane                   |                                                                        | 2.1                                                                                                                                                                                                                                                                                                        |                   |                                                                       |
|                                                                 | Tetrahydrofuran             |                                                                        | 1.7                                                                                                                                                                                                                                                                                                        |                   |                                                                       |
|                                                                 | N,N-dimethylformamide       |                                                                        | 2.9-3.0                                                                                                                                                                                                                                                                                                    |                   |                                                                       |
| Sample Preparation                                              |                             |                                                                        |                                                                                                                                                                                                                                                                                                            |                   |                                                                       |
|                                                                 | Process Stream              | Compound of Interest                                                   |                                                                                                                                                                                                                                                                                                            |                   |                                                                       |
| <b>1</b>                                                        | Reaction streams            | <b>4</b><br><b>7</b><br>Difluorobenzene<br>1-Bromo-2,4-difluorobenzene | One ml of reaction mixture is quenched into 5 ml of water with 0.5% acetic acid. The quenched mixture is then extracted with 5 ml of methylene chloride. Two ml of the organic layer is then passed through a 0.2 um syringe filter containing ca.150 mg of 4 A molecular sieves and bottled for analysis. |                   |                                                                       |
| <b>2</b>                                                        | Final Concentration         | <b>4,7</b>                                                             | Sample is dissolved in DMF, 1:50                                                                                                                                                                                                                                                                           |                   |                                                                       |

| Method                | HPLC                       | Method No. |                      | Purpose               | Optical Purity of 7                    |          |
|-----------------------|----------------------------|------------|----------------------|-----------------------|----------------------------------------|----------|
| Conditions            |                            |            |                      |                       |                                        |          |
| Instrument            | Agilent                    |            |                      | Column Type           | Chiralcel AD-R, Diacel Inc.            |          |
| Detector Type         | UV                         |            |                      | Size & Packing        | 4.6x 250mm                             | 5.0 μm   |
| Monitoring Wavelength | 245 nm                     |            |                      | Temperature           | RT                                     |          |
| Recording time        | 30 min                     |            |                      | Flow Rate             | 1.0 mL/min                             |          |
| Equilibration Time    | 5 min                      |            |                      | Sampler Flush Solvent | Mobile Phase                           |          |
| Mobile Phase          | 40% Acetonitrile/60% Water |            |                      |                       |                                        |          |
| Retention Times       |                            |            |                      |                       |                                        |          |
|                       | Material                   |            |                      |                       | RT (min)                               | Comments |
|                       | 7 (R)                      |            |                      |                       | 22.4                                   |          |
|                       | 7 (S)                      |            |                      |                       | 18.9                                   |          |
| Sample Preparation    |                            |            |                      |                       |                                        |          |
|                       | Process Stream             |            | Compound of Interest | Inj. Vol              | Procedure                              |          |
| 1                     | Reaction mixture           |            | 7                    | 5.0 μL                | Remove solvent, dilute in mobile phase |          |

| Method                | HPLC                        | Method No.           |          | Purpose                                | Reaction monitoring of 7 to 8 to 9 to 10       |        |
|-----------------------|-----------------------------|----------------------|----------|----------------------------------------|------------------------------------------------|--------|
| Conditions            |                             |                      |          |                                        |                                                |        |
| Instrument            | Agilent                     |                      |          | Column Type                            | Xterra C18, Waters Assoc.                      |        |
| Detector Type         | UV                          |                      |          | Size & Packing                         | 4.6 x 150mm                                    | 3.5 μm |
| Monitoring Wavelength | 210 nm                      |                      |          | Temperature                            | RT                                             |        |
| Recording time        | 20 min                      |                      |          | Flow Rate                              | 1.0 mL/min                                     |        |
| Equilibration Time    | 5 min                       |                      |          | Sampler Flush Solvent                  | 90% Acetonitrile<br>10% Water                  |        |
| Mobile Phase          | A: Acetonitrile<br>B: Water |                      |          | Gradient                               | Time 0: 90%B<br>Time 50: 10%B<br>Time 55: 90%B |        |
| Retention Times       |                             |                      |          |                                        |                                                |        |
|                       | Material                    |                      | RRT      | RT (min)                               | Comments                                       |        |
|                       | 7                           |                      |          | 25.6                                   |                                                |        |
|                       | 8                           |                      |          | 28.5                                   |                                                |        |
|                       | 9                           |                      |          | 21.3                                   |                                                |        |
|                       | 10                          |                      |          | 11.2                                   |                                                |        |
| Sample Preparation    |                             |                      |          |                                        |                                                |        |
|                       | Process Stream              | Compound of Interest | Inj. Vol | Procedure                              |                                                |        |
| 1                     | Reaction mixture            | 7,8,9,10             | 5.0 μL   | Dissolve in 50% acetonitrile/50% water |                                                |        |

| Method                | HPLC                          | Method No.           |          | Purpose                                       | Optical Purity of 12      |        |
|-----------------------|-------------------------------|----------------------|----------|-----------------------------------------------|---------------------------|--------|
| Conditions            |                               |                      |          |                                               |                           |        |
| Instrument            | Agilent                       |                      |          | Column Type                                   | Chiralcel AD, Diacel Inc. |        |
| Detector Type         | UV                            |                      |          | Size & Packing                                | 4.6x 250mm                | 5.0 μm |
| Monitoring Wavelength | 210 nm                        |                      |          | Temperature                                   | RT                        |        |
| Recording time        | 20 min                        |                      |          | Flow Rate                                     | 1.0 mL/min                |        |
| Equilibration Time    | 5 min                         |                      |          | Sampler Flush Solvent                         | Mobile Phase              |        |
| Mobile Phase          | 35% Ethyl Alcohol/65% Heptane |                      |          |                                               |                           |        |
| Retention Times       |                               |                      |          |                                               |                           |        |
|                       | Material                      |                      | RT (min) | Comments                                      |                           |        |
|                       | 12 undesired (R,S)            |                      | 14.1     | Non-fully characterized HPLC marker available |                           |        |
|                       | 12 desired                    |                      | 16.4     |                                               |                           |        |
| Sample Preparation    |                               |                      |          |                                               |                           |        |
|                       | Process Stream                | Compound of Interest | Inj. Vol | Procedure                                     |                           |        |
| 1                     | Reaction mixture              | 12                   | 5.0 μL   | Remove solvent, dilute in mobile phase        |                           |        |



| Method                | HPLC                       | Method No. |                      | Purpose               | Reaction monitoring of 10,16 and 12    |        |
|-----------------------|----------------------------|------------|----------------------|-----------------------|----------------------------------------|--------|
| Conditions            |                            |            |                      |                       |                                        |        |
| Instrument            | Agilent                    |            |                      | Column Type           | AS=303 ProPack C18, YMC Assoc.         |        |
| Detector Type         | UV                         |            |                      | Size & Packing        | 4.6 x 150mm                            | 5.0 μm |
| Monitoring Wavelength | 260 nm                     |            |                      | Temperature           | RT                                     |        |
| Recording time        | 10 min                     |            |                      | Flow Rate             | 1.0 mL/min                             |        |
| Equilibration Time    | 5 min                      |            |                      | Sampler Flush Solvent | 40% Acetonitrile<br>60% Water          |        |
| Mobile Phase          | 40% Acetonitrile/60% Water |            |                      |                       |                                        |        |
| Retention Times       |                            |            |                      |                       |                                        |        |
|                       | Material                   |            | RT (min)             |                       | Comments                               |        |
|                       | 10                         |            | 4.5                  |                       |                                        |        |
|                       | 10 (S,R)                   |            | 3.7                  |                       |                                        |        |
|                       | 16                         |            | 7.6                  |                       |                                        |        |
|                       | 16 (S,R)                   |            | 5.7                  |                       |                                        |        |
|                       | 12                         |            | 7.9                  |                       |                                        |        |
|                       | 12 (S,S)                   |            | 5.4                  |                       |                                        |        |
| Sample Preparation    |                            |            |                      |                       |                                        |        |
|                       | Process Stream             |            | Compound of Interest | Inj. Vol              | Procedure                              |        |
| 1                     | Reaction mixture           |            | 10, 16, 12           | 5.0 μL                | Dissolve in 40% acetonitrile/60% water |        |

| Method                | HPLC                         | Method No.           |          | Purpose                                | Optical Purity of 10      |        |
|-----------------------|------------------------------|----------------------|----------|----------------------------------------|---------------------------|--------|
| Conditions            |                              |                      |          |                                        |                           |        |
| Instrument            | Agilent                      |                      |          | Column Type                            | Chiralcel AD, Diacel Inc. |        |
| Detector Type         | UV                           |                      |          | Size & Packing                         | 4.6x 150mm                | 5.0 μm |
| Monitoring Wavelength | 210 nm                       |                      |          | Temperature                            | RT                        |        |
| Recording time        | 20 min                       |                      |          | Flow Rate                              | 1.0 mL/min                |        |
| Equilibration Time    | 5 min                        |                      |          | Sampler Flush Solvent                  | Mobile Phase              |        |
| Mobile Phase          | 90% Hexane/10% Ethyl Alcohol |                      |          |                                        |                           |        |
| Retention Times       |                              |                      |          |                                        |                           |        |
|                       | Material                     |                      | RT (min) | Comments                               |                           |        |
|                       | 10 desired                   |                      | 18.19    |                                        |                           |        |
|                       | 10 undesired                 |                      | 21.87    |                                        |                           |        |
|                       |                              |                      |          |                                        |                           |        |
| Sample Preparation    |                              |                      |          |                                        |                           |        |
|                       | Process Stream               | Compound of Interest | Inj. Vol | Procedure                              |                           |        |
| 1                     | Reaction mixture             | 10                   | 5.0 μL   | Remove solvent, dilute in mobile phase |                           |        |

| Method                | HPLC                                         | Method No. |                      | Purpose               | Reaction monitoring of 12 and 13 |        |
|-----------------------|----------------------------------------------|------------|----------------------|-----------------------|----------------------------------|--------|
| Conditions            |                                              |            |                      |                       |                                  |        |
| Instrument            | Agilent                                      |            |                      | Column Type           | ODS-AQ C18, YMC Assoc.           |        |
| Detector Type         | UV                                           |            |                      | Size & Packing        | 4.6 x 250mm                      | 5.0 μm |
| Monitoring Wavelength | 260 nm                                       |            |                      | Temperature           | RT                               |        |
| Recording time        | 15 min                                       |            |                      | Flow Rate             | 1.0 mL/min                       |        |
| Equilibration Time    | 5 min                                        |            |                      | Sampler Flush Solvent | 40% Acetonitrile<br>60% Water    |        |
| Mobile Phase          | 40% Acetonitrile/60% Water/0.02% Acetic acid |            |                      |                       |                                  |        |
| Retention Times       |                                              |            |                      |                       |                                  |        |
|                       | Material                                     |            |                      | RT (min)              | Comments                         |        |
|                       | 13                                           |            |                      | 8.1                   |                                  |        |
|                       | 12                                           |            |                      | 9.5                   |                                  |        |
| Sample Preparation    |                                              |            |                      |                       |                                  |        |
|                       | Process Stream                               |            | Compound of Interest | Inj. Vol              | Procedure                        |        |
| 1                     | Reaction mixture                             |            | 12,13                | 10.0 μL               | Dilute in mobile phase           |        |

| Method                | HPLC                         | Method No.           |          | Purpose                | Optical purity of 13            |        |
|-----------------------|------------------------------|----------------------|----------|------------------------|---------------------------------|--------|
| Conditions            |                              |                      |          |                        |                                 |        |
| Instrument            | Agilent                      |                      |          | Column Type            | Chiralcel OD, Diacel            |        |
| Detector Type         | UV                           |                      |          | Size & Packing         | 4.6 x 250mm                     | 5.0 μm |
| Monitoring Wavelength | 215 nm                       |                      |          | Temperature            | RT                              |        |
| Recording time        | 30 min                       |                      |          | Flow Rate              | 1.0 mL/min                      |        |
| Equilibration Time    | 5 min                        |                      |          | Sampler Flush Solvent  | 80% Hexane<br>20% Ethyl Alcohol |        |
| Mobile Phase          | 80% Hexane/20% Ethyl Alcohol |                      |          |                        |                                 |        |
| Retention Times       |                              |                      |          |                        |                                 |        |
|                       | Material                     |                      | RT (min) |                        | Comments                        |        |
|                       | 13 desired                   |                      | 16.2     |                        |                                 |        |
|                       | 13 undesired                 |                      | 20.1     |                        |                                 |        |
| Sample Preparation    |                              |                      |          |                        |                                 |        |
|                       | Process Stream               | Compound of Interest | Inj. Vol | Procedure              |                                 |        |
| 1                     | Reaction mixture             | 13                   | 5.0 μL   | Dilute in mobile phase |                                 |        |

| Method                | HPLC                                        | Method No.           |          | Purpose                                                                                                                                                                                   | Reaction monitoring of <b>13</b> and <b>14</b> |         |
|-----------------------|---------------------------------------------|----------------------|----------|-------------------------------------------------------------------------------------------------------------------------------------------------------------------------------------------|------------------------------------------------|---------|
| Conditions            |                                             |                      |          |                                                                                                                                                                                           |                                                |         |
| Instrument            | Perkin Elmer                                |                      |          | Column Type                                                                                                                                                                               | ODS-A C18, YMC Assoc.                          |         |
| Detector Type         | UV                                          |                      |          | Size & Packing                                                                                                                                                                            | 4.6 x 150mm                                    | 10.0 μm |
| Monitoring Wavelength | 205 nm                                      |                      |          | Temperature                                                                                                                                                                               | RT                                             |         |
| Recording time        | 15 min                                      |                      |          | Flow Rate                                                                                                                                                                                 | 1.0 mL/min                                     |         |
| Equilibration Time    | 5 min                                       |                      |          | Sampler Flush Solvent                                                                                                                                                                     | Mobile Phase                                   |         |
| Mobile Phase          | 56% Methanol/44% Water-Acetic acid (2000:7) |                      |          |                                                                                                                                                                                           |                                                |         |
| Retention Times       |                                             |                      |          |                                                                                                                                                                                           |                                                |         |
|                       | Material                                    |                      | RT (min) | Comments                                                                                                                                                                                  |                                                |         |
|                       | 14 (diastereoisomer and ethyl acetate)      |                      | 3.1      |                                                                                                                                                                                           |                                                |         |
|                       | 13                                          |                      | 3.8      |                                                                                                                                                                                           |                                                |         |
|                       | 14                                          |                      | 7.7      |                                                                                                                                                                                           |                                                |         |
| Sample Preparation    |                                             |                      |          |                                                                                                                                                                                           |                                                |         |
|                       | Process Stream                              | Compound of Interest | Inj. Vol | Procedure                                                                                                                                                                                 |                                                |         |
| 1                     | Reaction mixture                            | 13,14                | 20.0 μL  | 5 μL of reaction mixture is added to a mixture of 1 mL MTBE and 200 μL of 10% K <sub>2</sub> CO <sub>3</sub> . Then dilute 200 μL of organic layer to 700 μL with 70% methanol/30% water. |                                                |         |

| Method                | HPLC                                               | Method No.           |          | Purpose                          | Reaction monitoring of <b>1</b> and <b>14</b> |        |
|-----------------------|----------------------------------------------------|----------------------|----------|----------------------------------|-----------------------------------------------|--------|
| Conditions            |                                                    |                      |          |                                  |                                               |        |
| Instrument            | Perkin Elmer                                       |                      |          | Column Type                      | ODS-AQ C18, YMC Assoc.                        |        |
| Detector Type         | UV                                                 |                      |          | Size & Packing                   | 4.6 x 150mm                                   | 5.0 μm |
| Monitoring Wavelength | 265 nm                                             |                      |          | Temperature                      | RT                                            |        |
| Recording time        | 15 min                                             |                      |          | Flow Rate                        | 1.0 mL/min                                    |        |
| Equilibration Time    | 5 min                                              |                      |          | Sampler Flush Solvent            | Mobile Phase                                  |        |
| Mobile Phase          | 55% Acetonitrile/45% 20mM Ammonium Acetate, pH 4.5 |                      |          |                                  |                                               |        |
| Retention Times       |                                                    |                      |          |                                  |                                               |        |
|                       | Material                                           |                      | RT (min) | Comments                         |                                               |        |
|                       | <b>1</b>                                           |                      | 10.4     |                                  |                                               |        |
|                       | <b>14</b>                                          |                      | 3.1      |                                  |                                               |        |
|                       | <b>1</b> diastereomer                              |                      | 6.3      |                                  |                                               |        |
|                       | <b>1</b> acylated by bromoacetophenone impurity    |                      | 8.4      |                                  |                                               |        |
| Sample Preparation    |                                                    |                      |          |                                  |                                               |        |
|                       | Process Stream                                     | Compound of Interest | Inj. Vol | Procedure                        |                                               |        |
| <b>1</b>              | Reaction mixture                                   | <b>1, 14</b>         | 20.0 μL  | Samples diluted in acetonitrile. |                                               |        |

| Method                | HPLC                       | Method No.           |          | Purpose                                | Optical Purity of 1         |        |
|-----------------------|----------------------------|----------------------|----------|----------------------------------------|-----------------------------|--------|
| Conditions            |                            |                      |          |                                        |                             |        |
| Instrument            | Agilent                    |                      |          | Column Type                            | Chiralcel AD-R, Diacel Inc. |        |
| Detector Type         | UV                         |                      |          | Size & Packing                         | 4.6x 150mm                  | 5.0 μm |
| Monitoring Wavelength | 245 nm                     |                      |          | Temperature                            | RT                          |        |
| Recording time        | 30 min                     |                      |          | Flow Rate                              | 1.0 mL/min                  |        |
| Equilibration Time    | 5 min                      |                      |          | Sampler Flush Solvent                  | Mobile Phase                |        |
| Mobile Phase          | 40% Acetonitrile/60% Water |                      |          |                                        |                             |        |
| Retention Times       |                            |                      |          |                                        |                             |        |
|                       | Material                   |                      | RT (min) |                                        |                             |        |
|                       | 1                          |                      | 18.9     |                                        |                             |        |
|                       | 1 enantiomer               |                      | 22.4     |                                        |                             |        |
| Sample Preparation    |                            |                      |          |                                        |                             |        |
|                       | Process Stream             | Compound of Interest | Inj. Vol | Procedure                              |                             |        |
| 1                     | Reaction mixture           | 1                    | 1.0 μL   | Remove solvent, dilute in mobile phase |                             |        |
